# Supplementary material for: Reduced energy loss enabled by thiophene-based interlayers for high performance and stable perovskite solar cells
Source: Royal Society of Chemistry journal article supplement (doi:10.1039/d0ta10270a), 2021-01-01
Supplement: d0ta10270a1.pdf [file d0ta10270a1.pdf]

## Supporting Information

### **Reduced energy loss enabled by thiophene-based interlayer for high performance and stable perovskite solar cells**

Jiankai Zhang<sup>a</sup>, Huangzhong Yu<sup>a, b, c, d\*</sup>

<sup>a</sup>*School of Physics and Optoelectronics, South China University of Technology, Guangzhou 510640, Guangdong, China*

<sup>b</sup>*The Key Laboratory of Functional Molecular Solids, Ministry of Education, Anhui Normal University, Wuhu 241000, Anhui, China*

<sup>c</sup>*Guangdong Provincial Key Laboratory of New and Renewable Energy Research and Development, Guangzhou 510640, Guangdong, China*

<sup>d</sup>*South China Institute of Collaborative Innovation, Dongguan 523808, Guangdong, China*

\*Corresponding author. E-mail address: [hzyu@scut.edu.cn](mailto:hzyu@scut.edu.cn) (H. Yu).

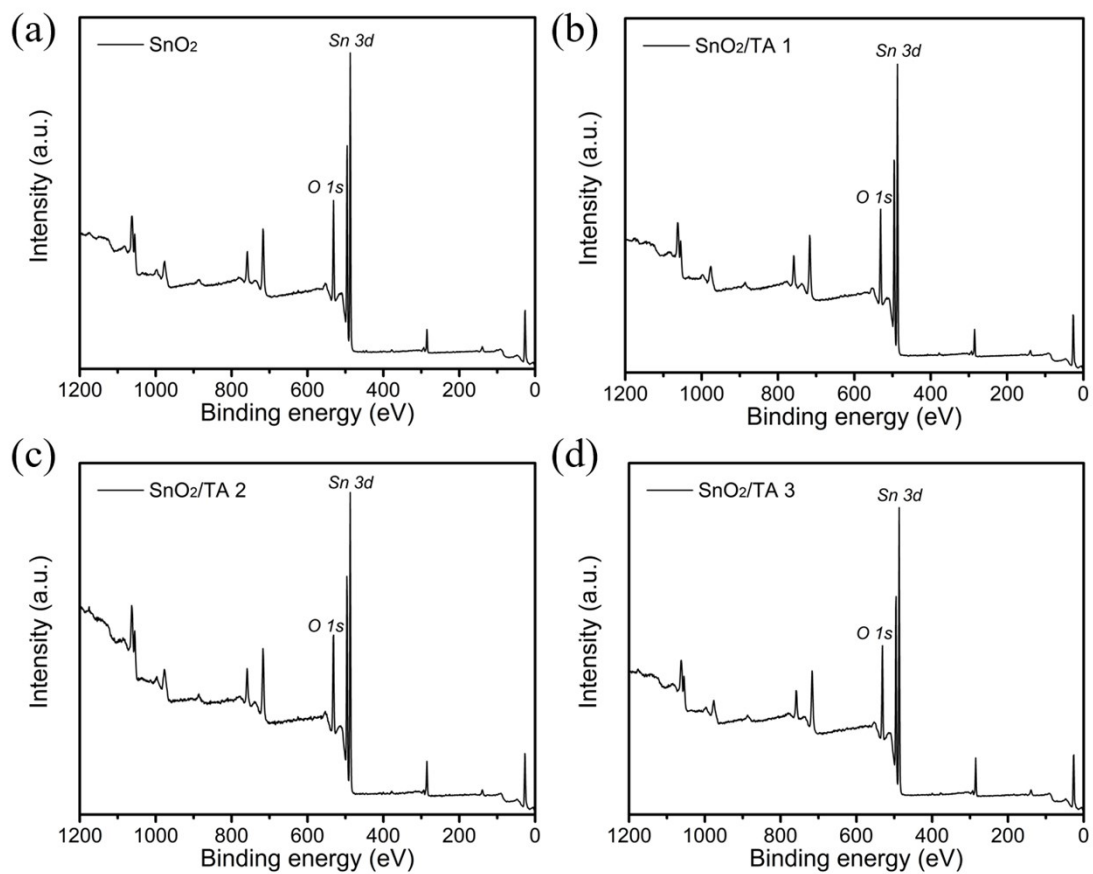

**Figure S1** XPS spectra for the pristine SnO<sub>2</sub> and TA interlayers modified SnO<sub>2</sub> ETLs

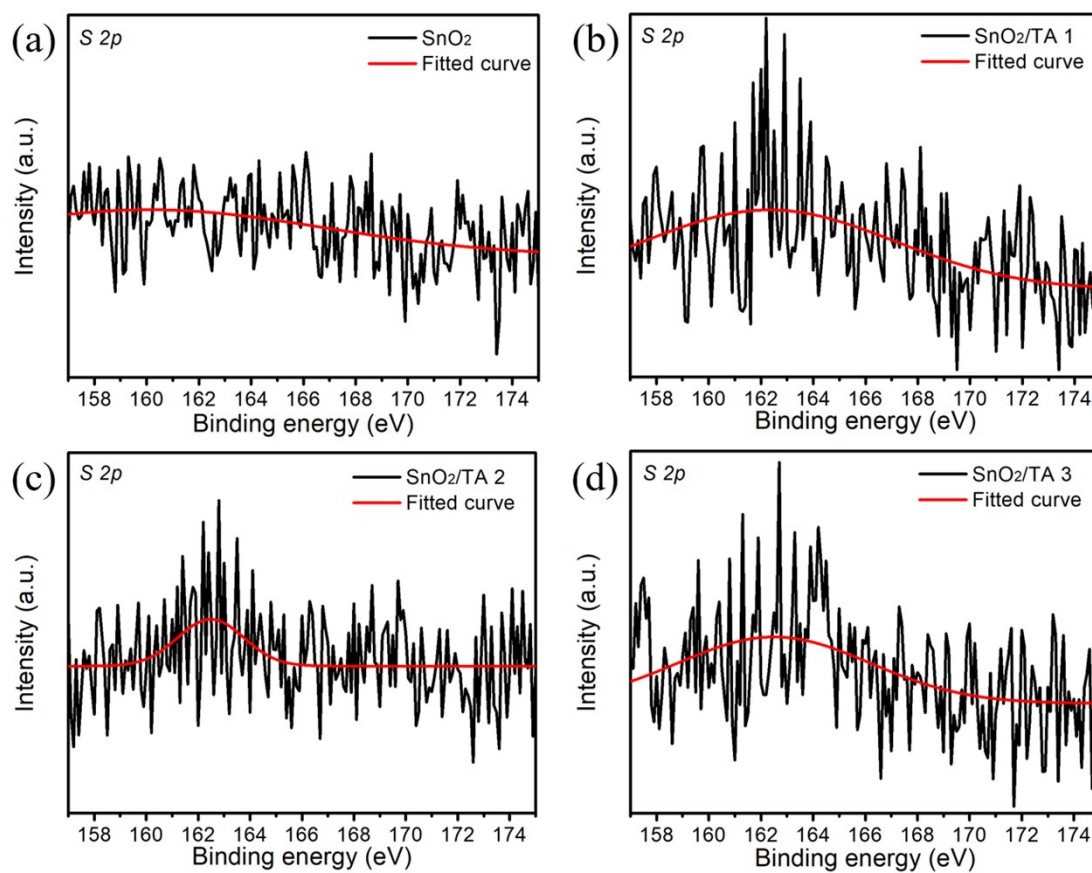

**Figure S2** XPS spectra for the pristine SnO<sub>2</sub> and TA interlayers modified SnO<sub>2</sub> ETLs.

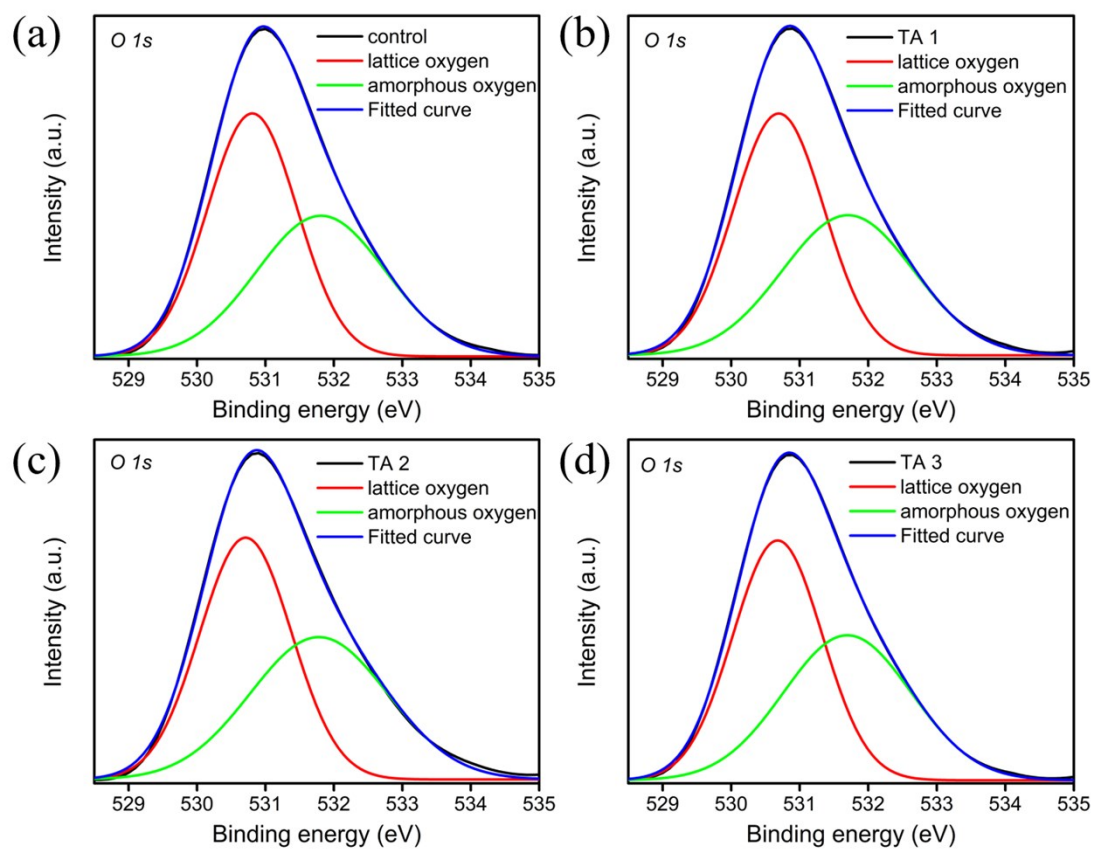

**Figure S3** O 1s core-level spectra of a) SnO<sub>2</sub>; b) SnO<sub>2</sub>/TA 1; c) SnO<sub>2</sub>/TA 2; d) SnO<sub>2</sub>/TA 3 ETLs.

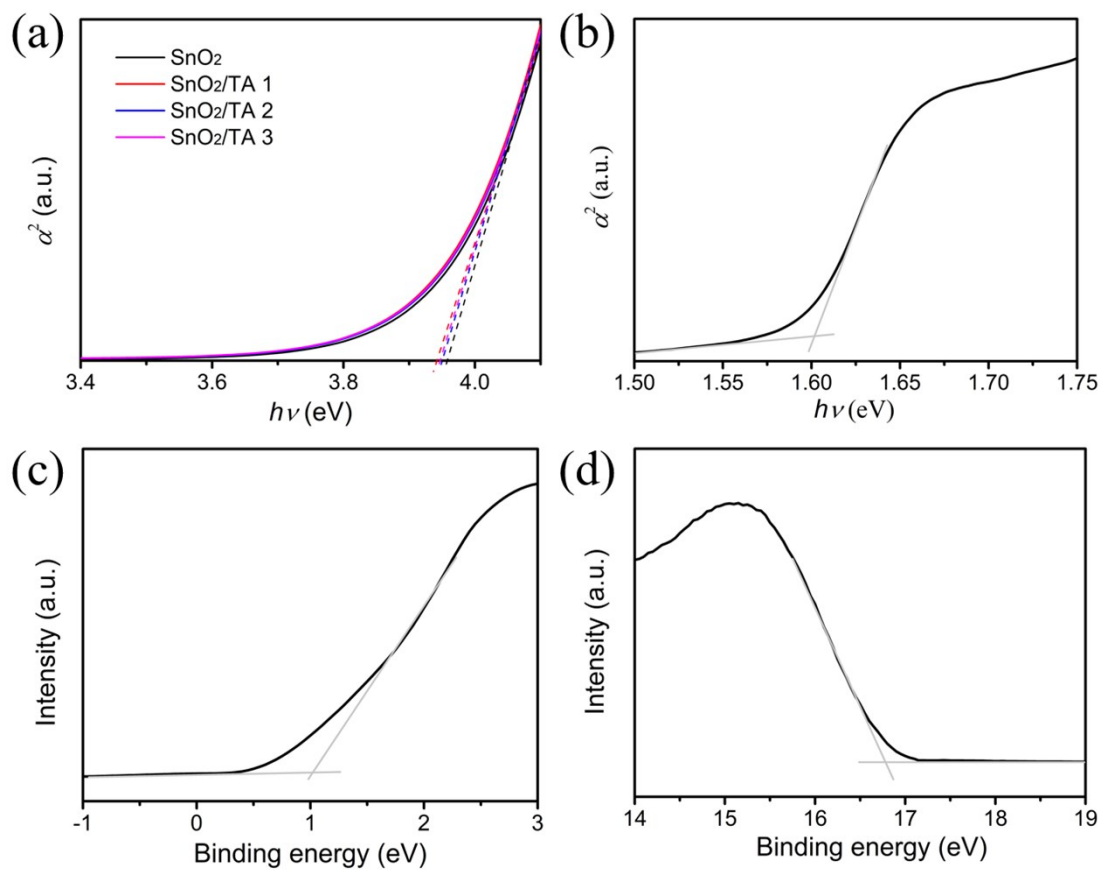

**Figure S4** a) Optical bandgap of SnO<sub>2</sub> surface with different TA interlayers modifications. b) Optical bandgap of perovskite film. UPS onset (c) and second electron cutoff (d) binding energy of perovskite film.

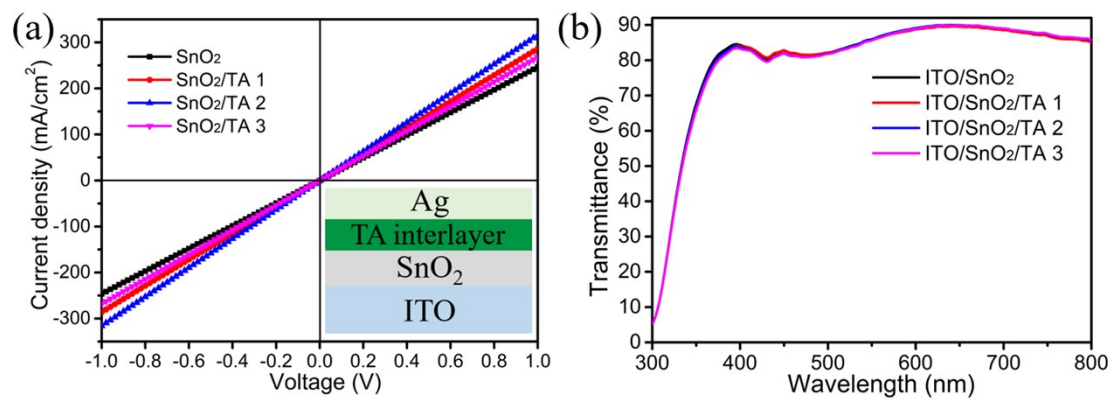

**Figure S5** a) Dark current-voltage characteristics of devices shown as inset in the figure. b) Transmittance spectra of the pristine SnO<sub>2</sub> and TA interlayers modified SnO<sub>2</sub> ETLs.

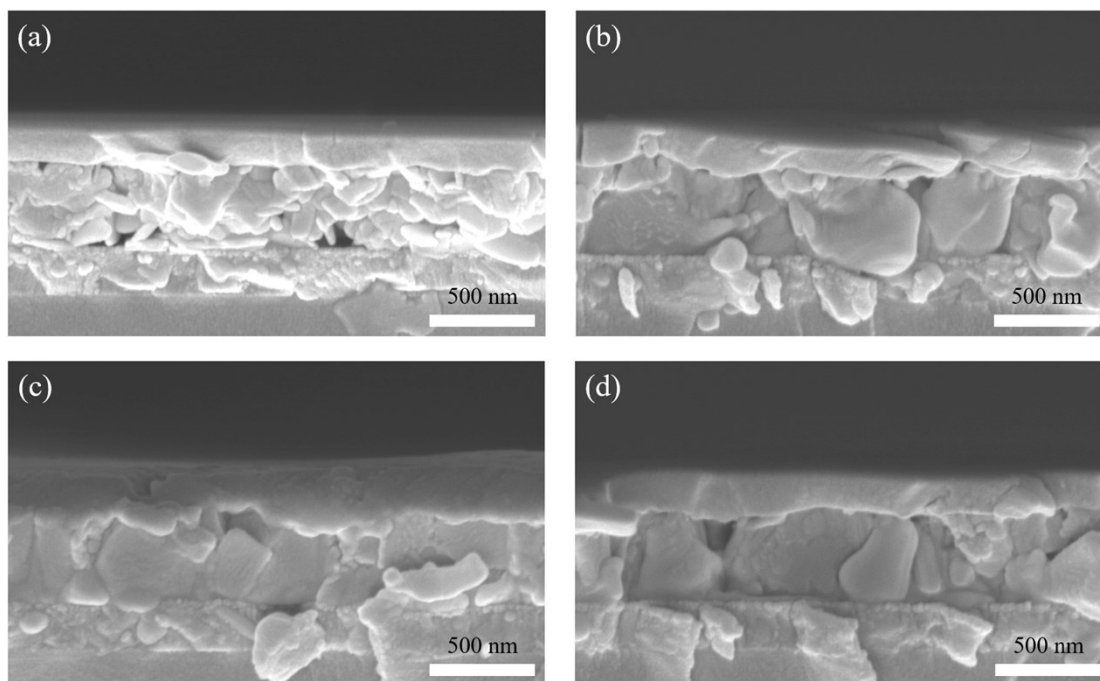

**Figure S6** Cross-sectional SEM images of the control sample (a), TA 1 interlayer modified sample (b), TA 2 interlayer modified sample (c), and TA 3 interlayer modified sample.

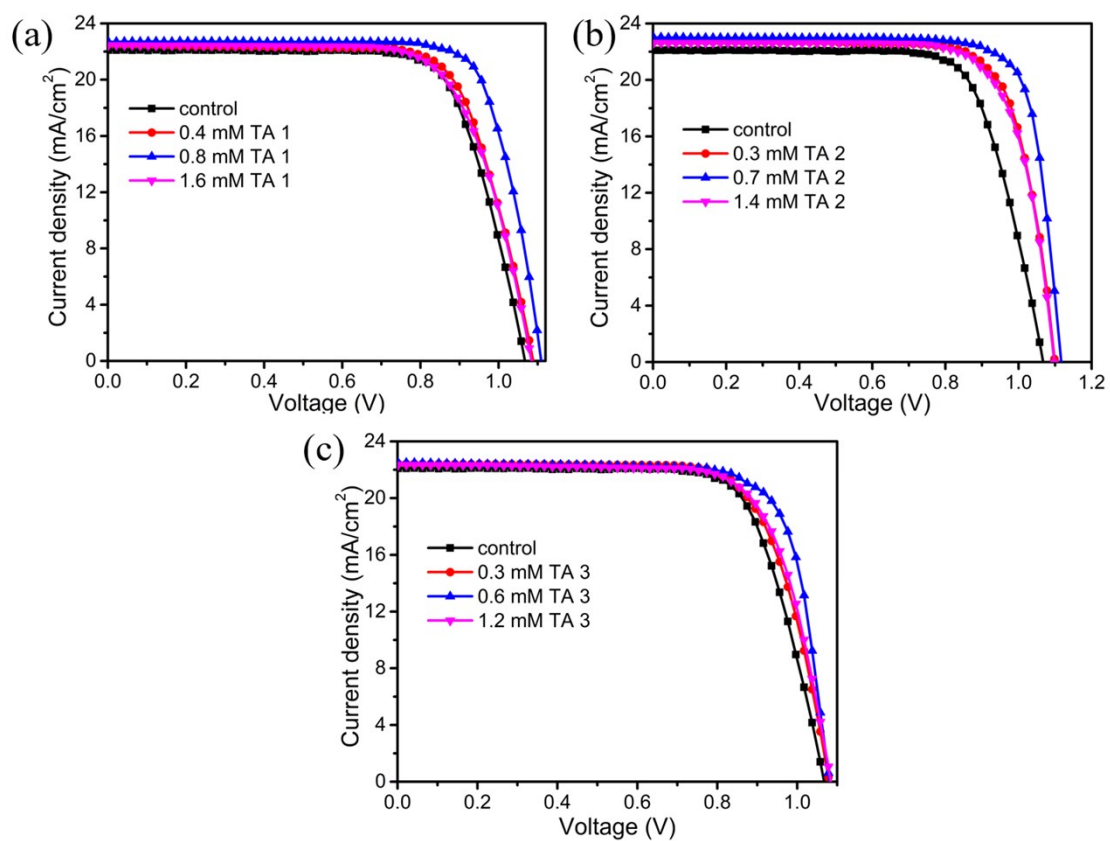

**Figure S7** Current density-voltage ( $J-V$ ) curves for modified PVSCs under different condition: modified with TA 1 (a), TA 2 (b) and TA 3 (c) interlayers with different solution concentrations.



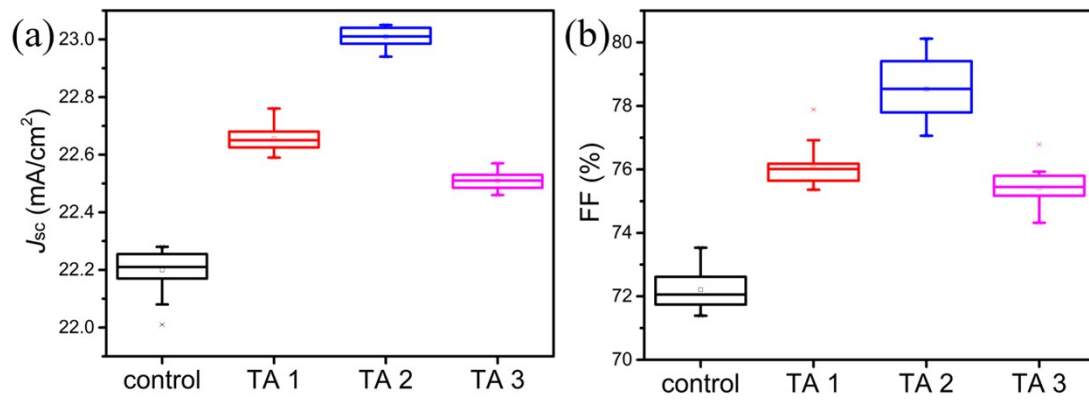

**Figure S8** Statistics of  $J_{sc}$  and FF distributions.

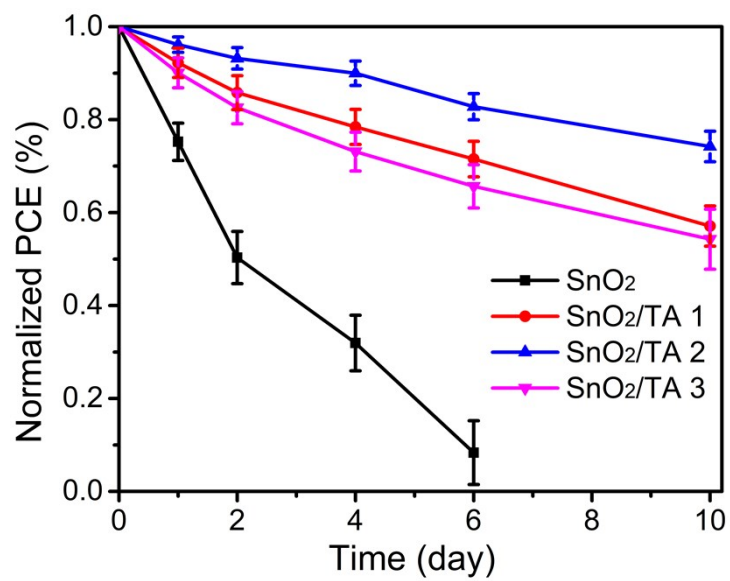

**Figure S9** Long-term stability test for unencapsulated PVSCs exposed to the ambient condition (RH:  $\approx$  70%).

**Table S1** The FWHM of characteristic peaks for MAPbI<sub>3</sub> films grown on pristine SnO<sub>2</sub> and TA interlayers modified SnO<sub>2</sub> ETL substrates.

| Samples                                   | Peak position (degree) | plane | FWHM (nm) |
|-------------------------------------------|------------------------|-------|-----------|
| SnO <sub>2</sub> /MAPbI <sub>3</sub>      | 14.18                  | (110) | 0.124     |
|                                           | 28.52                  | (220) | 0.139     |
|                                           | 31.97                  | (310) | 0.169     |
| SnO <sub>2</sub> /TA 1/MAPbI <sub>3</sub> | 14.18                  | (110) | 0.099     |
|                                           | 28.52                  | (220) | 0.133     |
|                                           | 31.97                  | (310) | 0.167     |
| SnO <sub>2</sub> /TA 2/MAPbI <sub>3</sub> | 14.18                  | (110) | 0.097     |
|                                           | 28.52                  | (220) | 0.072     |
|                                           | 31.97                  | (310) | 0.161     |
| SnO <sub>2</sub> /TA 3/MAPbI <sub>3</sub> | 14.18                  | (110) | 0.105     |
|                                           | 28.52                  | (220) | 0.138     |
|                                           | 31.97                  | (310) | 0.168     |

**Table S2** Summary of bi-exponential fitting results of the TRPL spectra.

| Samples                                        | A <sub>1</sub> (%) | τ <sub>1</sub> (ns) | A <sub>2</sub> (%) | τ <sub>2</sub> (ns) | τ <sub>ave</sub> (ns) |
|------------------------------------------------|--------------------|---------------------|--------------------|---------------------|-----------------------|
| ITO/SnO <sub>2</sub> /MAPbI <sub>3</sub>       | 9.38               | 95.49               | 90.62              | 9.22                | 53.86                 |
| ITO/ SnO <sub>2</sub> /TA 1/MAPbI <sub>3</sub> | 10.15              | 72.98               | 89.85              | 8.93                | 39.68                 |
| ITO/ SnO <sub>2</sub> /TA 2/MAPbI <sub>3</sub> | 5.53               | 52.23               | 94.47              | 7.10                | 20.67                 |
| ITO/ SnO <sub>2</sub> /TA 3/MAPbI <sub>3</sub> | 11.60              | 84.88               | 88.40              | 9.02                | 50.93                 |

The curves are fitted by the bi-exponential decay model:

$$y = A_1 \exp\left(-\frac{x}{\tau_1}\right) + A_2 \exp\left(-\frac{x}{\tau_2}\right) + y_0 \quad (1)$$

where τ<sub>1</sub> and τ<sub>2</sub> are the lifetimes for the fast and slow recombination, respectively. The average lifetime τ<sub>ave</sub> is calculated according to the equation:

$$\tau_{ave} = \frac{A_1 \tau_1^2 + A_2 \tau_2^2}{A_1 \tau_1 + A_2 \tau_2} \quad (2)$$

**Table S3** Average photovoltaic parameters of PVSCs modified by TA 1 interlayer with different concentrations (20 devices from different batches for each condition).

| Concentration (mM) | $J_{SC}$ (mA/cm <sup>2</sup> ) | $V_{OC}$ (V) | FF (%) | PCE (%) |
|--------------------|--------------------------------|--------------|--------|---------|
| 0                  | 22.20                          | 1.071        | 72.21  | 17.16   |
| 0.4                | 22.51                          | 1.092        | 73.68  | 18.10   |
| 0.8                | 22.66                          | 1.107        | 76.04  | 19.06   |
| 1.6                | 22.47                          | 1.085        | 73.53  | 17.92   |

**Table S4** Average photovoltaic parameters of PVSCs modified by TA 2 interlayer with different concentrations (20 devices from different batches for each condition).

| Concentration (mM) | $J_{SC}$ (mA/cm <sup>2</sup> ) | $V_{OC}$ (V) | FF (%) | PCE (%) |
|--------------------|--------------------------------|--------------|--------|---------|
| 0                  | 22.20                          | 1.071        | 72.21  | 17.16   |
| 0.3                | 22.68                          | 1.095        | 76.38  | 18.97   |
| 0.7                | 22.99                          | 1.112        | 78.53  | 20.08   |
| 1.4                | 22.61                          | 1.085        | 74.79  | 18.35   |

**Table S5** Average photovoltaic parameters of PVSCs modified by TA 3 interlayer with different concentration (20 devices from different batches for each condition).

| Concentration (mM) | $J_{SC}$ (mA/cm <sup>2</sup> ) | $V_{OC}$ (V) | FF (%) | PCE (%) |
|--------------------|--------------------------------|--------------|--------|---------|
| 0                  | 22.20                          | 1.071        | 72.21  | 17.16   |
| 0.3                | 22.40                          | 1.076        | 73.64  | 17.76   |
| 0.6                | 22.51                          | 1.079        | 75.42  | 18.31   |
| 1.2                | 22.36                          | 1.074        | 73.02  | 17.54   |
